# Supplementary material
Source: PubMed Central journal article supplement (PMC3065380)
Supplement: NIHMS278859-supplement-1_si_001.pdf [file NIHMS278859-supplement-1_si_001.pdf]

## SUPPORTING INFORMATION

### Gas-phase Fragmentation of Deprotonated *p*-Hydroxyphenacyl Derivatives

Marek Remeš,<sup>a,b</sup> Jana Roithová,<sup>a,\*</sup> Detlef Schröder,<sup>b,\*</sup> Elizabeth Cope,<sup>c</sup> Chamani Perera,<sup>c</sup> Sanjeewa Senadheera,<sup>c</sup> Kenneth Stensrud,<sup>c</sup> Chi-cheng Ma,<sup>c</sup> and Richard S. Givens<sup>c</sup>

<sup>a</sup> *Department of Organic Chemistry, Faculty of Sciences, Charles University in Prague, Hlavova 8, 12083 Prague 2, Czech Republic*

<sup>b</sup> *Institute of Organic Chemistry and Biochemistry, Academy of Sciences of the Czech Republic, Flemingovo náměstí 2, 16610 Prague 6, Czech Republic*

<sup>c</sup> *Department of Chemistry, University of Kansas, Lawrence, Kansas 66045, U.S.A.*

#### Contents

|                                                          |     |
|----------------------------------------------------------|-----|
| Synthesis of the new pHP derivatives                     | S2  |
| Products of CID of the mass-selected ions                | S8  |
| Breakdown diagrams for the CID of the mass-selected ions | S9  |
| Energies and geometries of the calculated structures     | S15 |

## Synthesis and spectral properties of new pHP esters

### I. Phenolates (X = C<sub>6</sub>H<sub>5</sub>O, *p*-CF<sub>3</sub>C<sub>6</sub>H<sub>4</sub>O, and *p*-CH<sub>3</sub>OC<sub>6</sub>H<sub>4</sub>O)

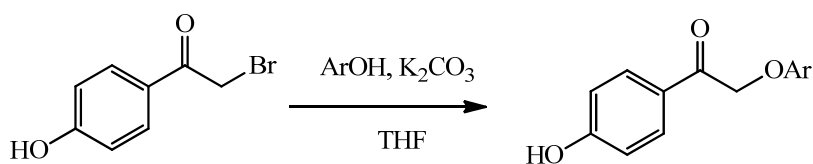

**2'-Phenoxy-4-hydroxyacetophenone** (pHP OC<sub>6</sub>H<sub>5</sub>). To a solution of 0.7 g (7.4 mmol) of phenol and 1.0 g (7.4 mmol) potassium carbonate in 20 mL of THF in ice bath, was added dropwise to a solution of 1.3 g (8.7 mmol) of  $\alpha$ -bromo pHP in 20 mL THF by an additional funnel. After 2 h, the white solid was filtered and the remaining solution of filtrate was stirred with a magnetic stir bar at room temperature for an additional 24 h. The mixture was filtered, the filtrate was concentrated using a rotary evaporator. Flash chromatography 3/1 hexane/EtOAc was used to separate the mixture and to obtain the product 0.5 g, (Procedure A). Needle crystals with mp 167-169 °C. Spectral data: UV  $\epsilon_{271}=18000$ ,  $\epsilon_{218}=19000$ . (KBr), 3211(OH), 1664 (C=O). <sup>1</sup>H NMR (CDCl<sub>3</sub>)  $\delta$  5.25 (s, 2H), 6.8-7.9 (m, 9H); <sup>13</sup>C NMR (CDCl<sub>3</sub>)  $\delta$  (ppm) 70.2, 114.8, 115.5, 121.3, 129.5, 130.8, 158.7, 163.6, 194.4. HRMS, [M+Na]<sup>+</sup>, calc. 251.0684, found, 251.0678.

**2'-(4'-Trifluoromethylphenoxy)-4-hydroxyacetophenone** (pHP *p*-CF<sub>3</sub>C<sub>6</sub>H<sub>4</sub>O). This was synthesized by procedure A above. White solid with mp 174-175 °C. Spectral data: UV  $\epsilon_{271}=238000$ ,  $\epsilon_{223}=251000$ . IR (KBr), 3151(OH), 1668 (C=O). <sup>1</sup>H NMR (CDCl<sub>3</sub>)  $\delta$  (ppm) 5.47 (s, 2H), 6.98 (d, *J* = 8.8 Hz, 2H), 7.08 (d, *J* = 8.8 Hz, 2H), 7.62 (d, *J* = 8.8 Hz, 2H), 7.95 (d, *J* = 8.8 Hz, 2H); <sup>13</sup>C NMR (CDCl<sub>3</sub>)  $\delta$  (ppm) 71.1, 116.1, 116.5, 118.4, 127.1, 136.8, 123.4 (q, *J* = 32.4 Hz, 1C), 131.8, 125.7 (q, *J* = 268.5 Hz, 1C), 162.2, 163.2, 193.1. HRMS, [M+H]<sup>+</sup>, calc. 297.0739, found, 297.0739.

**2'-(4'-Methoxyphenoxy)-4-hydroxyacetophenone** (pHP *p*-CH<sub>3</sub>OC<sub>6</sub>H<sub>4</sub>O). This was synthesized by procedure A above. Solid with mp 133-134 °C. Spectral data: UV  $\epsilon_{273}=181000$ ,  $\epsilon_{220}=185000$ . IR (KBr), 3323(OH), 1666 (C=O). <sup>1</sup>H NMR (CDCl<sub>3</sub>)  $\delta$  (ppm) 3.75 (s, 3H), 5.29 (s, 2H), 6.87 (m, 4H), 6.92 (d, *J* = 8.8 Hz, 2H), 7.92 (d, *J* = 8.8 Hz, 2H); <sup>13</sup>C NMR (CDCl<sub>3</sub>)  $\delta$  (ppm) 55.6, 71.0, 114.9, 115.7, 115.9, 127.6, 131.1, 152.7, 154.6, 162.3, 193.6. HRMS, [M+H]<sup>+</sup>, calc. 259.0970, found, 259.0967.

## II. pHP trifluoroacetate (pHP CF<sub>3</sub>COO).

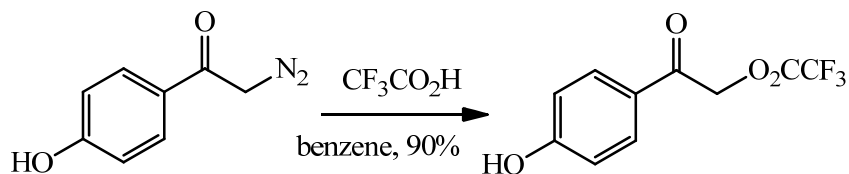

***p*-Hydroxyphenacyl trifluoroacetate (pHP CF<sub>3</sub>COO).** To a cooled (0 °C), stirred solution of  $\alpha$ -diazo-*p*-hydroxyacetophenone (10 mg, 0.062 mmol) in benzene (6 mL), trifluoroacetic acid (14 mg, 0.12 mmol) was added dropwise at 0 °C. The resulting mixture was stirred at 0 °C to rt and the progress of the reaction was monitored by TLC. After 1 h the benzene layer was washed sequentially with saturated NaHCO<sub>3</sub> (20 mL) and water (20 mL) and dried over anhydrous MgSO<sub>4</sub>. The solvent was evaporated to give crude trifluoroacetate ester as a yellowish brown solid that was chromatographed on silica gel (EtOAc/hexane 1:1) to give pure pHP CF<sub>3</sub>COO as a white solid (14 mg, 0.056 mmol, 94% yield) with mp = 128-131 °C. Spectral data: <sup>1</sup>H NMR (CD<sub>3</sub>COCD<sub>3</sub>)  $\delta$  (ppm) 9.43 (1H, s), 7.95-7.93 (2H, dd,  $J$  = 6.8 Hz, 2 Hz), 7.00-6.98 (2H, dd,  $J$  = 6.8 Hz, 2 Hz), 5.81 (2H, s), <sup>19</sup>F NMR (376 MHz, CDCl<sub>3</sub>)  $\delta$  (ppm) -75.7 (3F, s); <sup>13</sup>C NMR (125 MHz, CD<sub>3</sub>COCD<sub>3</sub>)  $\delta$  (ppm) 188.6, 163.9, 157.5, 131.5, 126.8, 116.9, 114.7, 69.9; IR (KBr, cm<sup>-1</sup>) 3240, 1782, 1674, 1605, 1574, 960, 845, 725; ESI-HRMS, [M-H]<sup>+</sup>, calc. 247.0218, found: 247.0218.

## III. pHP formate and *p*-methoxybenzoate (pHP HCOO and pHP *p*-MeOC<sub>6</sub>H<sub>4</sub>COO).

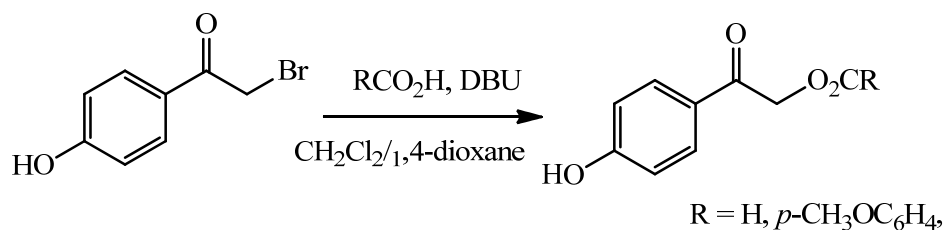

***p*-Hydroxyphenacyl Formate (pHP HCOO).** Method A. Carboxylate esters were synthesized according to a method based upon a method used by Buu-Hoi and Lavit.<sup>S1</sup>  $\alpha$ -Bromo-*p*-hydroxyacetophenone (1.2 g, 5.4 mmol) and DBU (1.7 mL, 11 mmol), were combined and placed in a 250 mL round bottom flask and dissolved in 100 mL of 1:1 CH<sub>2</sub>Cl<sub>2</sub>/1,4-dioxane and cooled to 0° C. Once the acid and base solutions were cool, the formic acid (0.50 mL, 8.1 mmol) was slowly added to the base making sure to keep the flask cold. When the acid had dissolved, the solution was stirred and was monitored by TLC (1:1 hexanes/EtOAc). When the reaction was judged to be complete, equal volumes of CH<sub>2</sub>Cl<sub>2</sub> and H<sub>2</sub>O were added to the reaction mixture. The organic layer was washed 3 times with 50 mL of H<sub>2</sub>O, 50 mL saturated NaHCO<sub>3</sub> solution, and dilute HCl and then washed once with

brine, dried over  $\text{MgSO}_4$ , and gravity filtered. The solvent was removed using rotoevaporation. Purification was performed using column chromatography (6:4 hexanes/EtOAc) or by recrystallization in EtOAc to yield a white crystalline solid (0.34 g, 1.9 mmol, 35%; mp: 146 – 147 °C). Spectral data:  $^1\text{H}$  NMR (400 MHz,  $\text{DMSO-d}_6$ ):  $\delta$  (ppm) 10.58 (s, 1H), 8.46 (s, 1H), 7.91 (d, 2H), 6.94 (d, 2H), 5.54 (s, 2H).  $^{13}\text{C}$  NMR (500 MHz,  $\text{DMSO-d}_6$ ):  $\delta$  (ppm) 190.1, 162.7, 161.6, 130.4, 125.2, 115.4, 65.5. IR (KBr,  $\text{cm}^{-1}$ ): 3350, 2925, 1730, 1683, 1602, 1586, 1500, 822  $\text{cm}^{-1}$ . UV-VIS (9:1  $\text{CH}_3\text{CH}/\text{H}_2\text{O}$ )  $\lambda$  220 ( $\epsilon = 5,200$ ) and 280 ( $\epsilon = 10,000$ ). HRMS,  $[\text{M}+\text{H}]^+$ , calc. 181.052, found 181.0501 (M +H).

**Method B.** Potassium formate (2.7 g, 32 mmol) and a large stir bar were placed in a 500 mL Erlenmeyer flask. Absolute EtOH (150 mL) was added and the mixture was allowed to stir and heat at 55 – 60 °C for 15 minutes.  $\alpha$ -Bromo-*p*-hydroxyacetophenone (2.0 g, 44 mmol) was added to the flask and the reaction was heated to between 55 and 60 °C 24 h. The solution was hot filtered and the ethanol was removed. The resulting solid was dissolved in EtOAc and washed twice with water and once with saturated  $\text{NaHCO}_3$  and then brine. The organic layer was separated, dried, and the solvent was removed with rotoevaporation to afford a yellow solid. This solid was dissolved in acetone and purified by flash chromatography (1:1 hexane/EtOAc) to afford a white solid (0.33 g, 18 mmol, 41%; mp = 145 – 147 °C). The solid was recrystallized using 1:1 hexanes/ $\text{Et}_2\text{O}$  affording colorless crystals. This ester was also synthesized by the method employed for pHP trifluoroacetate.

***p*-Hydroxyphenacyl *p*-methoxybenzoate (pHP *p*-MeOC<sub>6</sub>H<sub>4</sub>COO)**  $\alpha$ -Bromo-*p*-hydroxyacetophenone (5.0 g, 23 mmol), DBU (5.2 mL, 35 mmol), and *p*-methoxybenzoic acid (4.6 g, 30 mmol) were combined in the procedure outline above. The reaction was judged to be complete after 6 hours. The crude solid was purified by flash chromatography (7:3 hexanes/EtOAc) and then by recrystallization in 8:2 hexanes/EtOAc resulting in colorless crystals (4.9 g, 17 mmol, 75%; mp: 184 – 185 °C) Spectral data:  $^1\text{H}$  NMR (400 MHz,  $\text{DMSO-d}_6$ ):  $\delta$  (ppm) 10.52 (s, 1h), 7.98 (d, 2H), 7.88 (d, 2H), 7.09 (m, 4H), 6.89 (d, 2H), 5.59 (s, 2H), 3.85 (s, 3H).  $^{13}\text{C}$  NMR (500 MHz,  $\text{DMSO-d}_6$ ):  $\delta$  (ppm) 191.2, 165.3, 163.7, 163.1, 131.9, 130.7, 125.9, 121.8, 115.9, 114.5, 66.8, 56.0. IR (KBr,  $\text{cm}^{-1}$ ): 3357, 16805 1680, 1604, 1583, 1500. UV-VIS (7:3  $\text{CH}_3\text{CN}/\text{H}_2\text{O}$ )  $\lambda$  273 ( $\epsilon = 23000$ )

#### IV. pHP mesylate and pHP tosylate (pHP MsO and pHP TsO).

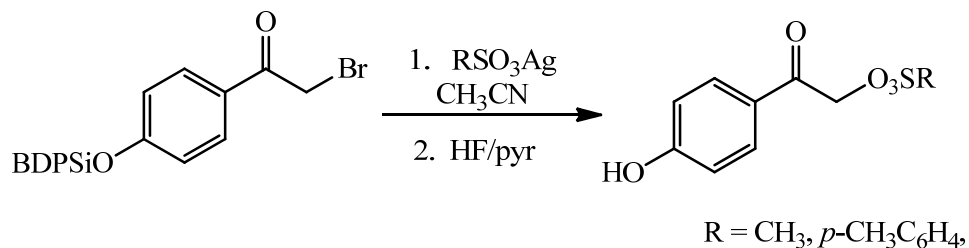

***p*-Hydroxyphenacyl Mesylate pHP MsO.** *tert*-Butyldiphenylsilyl protected *p*-hydroxyphenacyl mesylate was prepared according to a general method for carboxylate esters as described by Phillips and coworkers.<sup>S2</sup> 2-(4-(*tert*-Butyldiphenylsilyloxy)phenyl)-2-oxoethyl methanesulfonate was prepared according to a method based on one described by Emmons and Ferris.<sup>S4</sup> Silver oxide (5.0 g, 40 mmol) was placed in a 250 mL round bottom flask with a stir bar. Acetonitrile (50 mL) was added to the flask and stirred vigorously to form a suspension. Methanesulfonic acid (1.8 mL, 2.6 g, 27 mmol) was added to the silver oxide suspension. The solution was allowed to stir at room temperature for 45 minutes. In a 500 mL Erlenmeyer flask, 2-(4-(*tert*-Butyldiphenylsilyloxy)phenyl)-2-oxoethyl bromide (9.4 g, 21 mmol) was dissolved in 100 mL CH<sub>3</sub>CN. After the time, the silver oxide solution was filtered and the filtrate was added to the bromide solution. This reaction mixture was stirred at 70 °C for 3 days. The mixture was filtered and the solvent removed. The yellow solid was dissolved in acetone and filtered again. Flash chromatography (7:3 hexane/Et<sub>2</sub>O) was used to purify the crude material resulting in a white solid (6.8 g, 14 mmol, 69 %) with mp: 108 – 110 °C. Spectral data: <sup>1</sup>H NMR (500 MHz, DMSO): δ (ppm) 7.69 (d, 2H), 7.58 (m, 4H), 7.37 (m, 6H), 6.88 (d, 2H), 5.47 (s, 2H), 2.04 (s, 3H), 0.98 (s, 9H). <sup>13</sup>C NMR (500 MHz, DMSO): δ (ppm) 192.5, 159.9, 134.9, 131.1, 130.5, 129.2, 127.2, 119.9, 71.0, 37.4, 29.0, 18.9. IR (KBr, cm<sup>-1</sup>): 1704, 1598, 1508, 1370, 1159, 821. HRMS, [M+H]<sup>+</sup>, calc. 469.1505, found 469.1505 (†).

Deprotection (Method A) involved placing the 4-*tert*-butyldiphenylsilyloxyphenacyl mesylate (1.5 g, 3.2 mmol) in a 100 mL round bottom flask equipped with stirring and cooling to 0 °C. The solid dissolved in 10 mL THF and allowed to cool for 5 minutes. TBAF (1M in THF, 3.60 mL, 3.24 mmol) was added to the solution. After 15 minutes the reaction was quenched with cold DI water and extracted with EtOAc. The organic layer was washed with NaHCO<sub>3</sub>, dilute HCL, and brine. The organic layer was dried over MgSO<sub>4</sub>, filtered, and the solvent removed. The crude solid was purified using flash chromatography (6:4 hexanes/EtOAc) resulting in an off white solid (0.41 g, 55%) with mp = 154 – 156 °C). Spectral data: <sup>1</sup>H NMR (500 MHz, DMSO-d<sub>6</sub>): δ (ppm) 10.56 (s, 1H), 7.85 (d, 2H), 6.90 (d, 2H), 5.61 (s, 2H), 3.36 (s, 3H). <sup>13</sup>C NMR (500 MHz, DMSO-d<sub>6</sub>): δ (ppm) 189.5, 162.8, 130.5,

125.1, 115.4, 70.9, 37.6. IR (KBr,  $\text{cm}^{-1}$ ): 3418, 1684, 1603, 1580, 1526, 1443, 1427, 1367, 1211, 1168, 1053, 839. UV-VIS (1:1  $\text{CH}_3\text{CN}/\text{H}_2\text{O}$ ):  $\lambda$  273 ( $\epsilon = 16,000$ ), 219 ( $\epsilon = 11,000$ ). HRMS,  $[\text{M}+\text{H}]^+$ , calc. 231.033, found 231.0327. **Method B** *p*-Hydroxyphenacyl mesylate was prepared according to a method based on one described by McDevitt and coworkers.<sup>S3</sup> Protected mesylate (1.0 g, 2.1 mmol) was dissolved in 15 mL dry THF in a 100 mL round bottom flask. The flask was equipped with stirring and placed in an ice bath. Hydrogen fluoride in pyridine (0.20 mL, 2.4 mmol) was slowly added to the round bottom flask. The mixture was allowed to stir for 1 h and then quenched with water. The mixture was extracted twice with 20 mL EtOAc. The organic layer was then washed with saturated  $\text{NaHCO}_3$  and brine. The organic layer was dried over  $\text{MgSO}_4$  and the solvent was removed using rotary evaporation. The crude solid was purified using flash chromatography (1:1 hexanes/EtOAc) resulting in a white solid (0.48 g, 2.1 mmol, 100%) with mp = 155 – 157 °C. This solid was recrystallized in 9:1 hexanes/EtOAc resulting in colorless crystals. This ester was also synthesized by the method employed for pHP trifluoroacetate.

***p*-Hydroxyphenacyl Tosylate (pHP TsO).** *p*-Hydroxyphenacyl tosylate was prepared according to a method based on one described by McDevitt and coworkers.<sup>3</sup> 2-(4-(*tert*-Butyldiphenylsilyloxy)phenyl)-2-oxoethyl 4-methylbenzene-sulfonate was prepared according to a method based on one described by Emmons and Ferris.<sup>S4</sup> Silver oxide (5.0 g, 40 mmol) was placed in a 250 mL round bottom flask with a stir bar. Acetonitrile (50 mL) was added to the flask and stirred vigorously to form a suspension. *p*-Toluenesulfonic acid (5.1 g, 27 mmol) was added to the silver oxide suspension. The solution was allowed to stir at rt for 45 min. In a 500 mL Erlenmeyer flask, BDPSi protected *p*-hydroxyphenacyl bromide (9.4 g, 21 mmol) was dissolved in 100 mL  $\text{CH}_3\text{CN}$ . After the time, the silver oxide solution was filtered and the filtrate was added to the bromide solution. This reaction mixture was stirred at 70 °C for 3 d. The mixture was filtered and the solvent removed. The orange solid was dissolved in acetone and filtered again. Flash chromatography (9:1 hexanes/ $\text{Et}_2\text{O}$ ) was used to purify the crude material resulting in an off-white solid (8.0 g, 15 mmol, 70 %) with mp = 120 – 122 °C. Spectral data:  $^1\text{H}$  NMR (500 MHz, DMSO):  $\delta$  (ppm) 7.90 (d, 2H), 7.80 (d, 2H), 7.70 (M, 4H), 7.54, (m, 6H), 6.82 (d, 2H), 5.41 (s, 2H), 3.42 (s, 3H), 1.08 (s, 9H).  $^{13}\text{C}$  NMR (500 MHz, DMSO):  $\delta$  (ppm) 192.5, 160.5, 145.8, 145.0, 134.9, 131.2, 130.5, 130.0, 128.4, 127.7, 126.2, 119.9, 71.0, 26.1, 21., 18.9. IR (KBr,  $\text{cm}^{-1}$ ): 1697, 1596, 1573, 1508, 1467, 1460, 1371, 1367, 1166, 827. HRMS,  $[\text{M}+\text{H}]^+$ , calc. 545.182, found 545.1818.

Removal of the protecting group from 4-*tert*-butyldiphenylsilyloxyphenacyl tosylate (1.0 g, 1.8 mmol) was accomplished by dissolving it in 15 mL dry THF in a 100 mL round bottom flask. The flask was equipped with stirring and placed in an ice bath. Hydrogen fluoride in pyridine (0.18 mL, 2.0 mmol) was slowly added to the round bottom flask. The mixture was allowed to stir for 1 h and then quenched with water. The mixture was extracted twice with 20 mL EtOAc. The organic layer was then washed with saturated NaHCO<sub>3</sub> and brine. The organic layer was dried over MgSO<sub>4</sub> and the solvent was removed using rotary evaporation. The crude solid was purified using flash chromatography (1:1 hexanes/EtOAc) resulting in a white solid (0.55 g, 1.8 mmol, 100%) with mp = 133 - 135° C. This solid was recrystallized in 9:1 hexanes/EtOAc resulting in colorless crystals. Spectral data: <sup>1</sup>H NMR (500 MHz, DMSO-d<sub>6</sub>): δ (ppm) 10.54 (s, 1H), 7.86 (d, 2H), 7.78 (d, 2H), 7.49 (d, 2H), 6.85 (d, 2H), 5.46 (s, 2H), 2.43 (s, 3H). <sup>13</sup>C NMR (500 MHz, DMSO-d<sub>6</sub>): δ (ppm) 188.8, 162.8, 145.0, 132.7, 130.6, 130.1, 127.7, 125.0, 115.4, 70.9, 21.1. IR (KBr, cm<sup>-1</sup>): 3420, 1689, 1599, 1576, 1510, 1463, 1458, 1369, 1361, 1167, 831. UV-VIS (1:1 CH<sub>3</sub>CN/H<sub>2</sub>O): λ 283 (ε = 16,000) and 225 (ε = 20,000). HRMS, [M-H]<sup>+</sup>, calc. C<sub>15</sub>H<sub>14</sub>O<sub>5</sub>S 305.048, found 305.0484. This ester was also synthesized by the method employed for pHP trifluoroacetate.

#### References

- S1 Buu-Hoi, N. P.; Lavit, D. J. *J. Chem. Soc.* **1955**, 18.  
S2 Ma, C.; Kwok, W. M.; Chan, W. S.; Zuo, P.; Kan, J. T. W.; Toy, P. H.; Phillips, D. L. *J. Am. Chem. Soc.* **2005**, *127*, 1463.  
S3 McDevitt, J. P.; Lansbury, J. P. T. *J. Am. Chem. Soc.* **1996**, *118*, 3818.  
S4 Emmons, W. D.; Ferris, A. F. *J. Am. Chem. Soc.* **1953**, *75*, 2257.

**Table S1:** Products of CID of the mass-selected ions.

| X =                                                       | $\Delta H_{\text{acid}}(\text{HX})$ | AE(others) | BR(others) | others ( $m/z$ )                                                                                                                                                                                                                                                                                                                                                                                                                                     |
|-----------------------------------------------------------|-------------------------------------|------------|------------|------------------------------------------------------------------------------------------------------------------------------------------------------------------------------------------------------------------------------------------------------------------------------------------------------------------------------------------------------------------------------------------------------------------------------------------------------|
| TosO                                                      | 1298                                |            |            |                                                                                                                                                                                                                                                                                                                                                                                                                                                      |
| MsO                                                       | 1343                                |            |            |                                                                                                                                                                                                                                                                                                                                                                                                                                                      |
| CF <sub>3</sub> COO                                       | 1355                                | 2.24       | 1          | 133<br>C <sub>8</sub> H <sub>5</sub> O <sub>2</sub> <sup>-</sup>                                                                                                                                                                                                                                                                                                                                                                                     |
| OP(O)(OEt) <sub>2</sub>                                   | 1387                                | 2.46       | 2          | 133<br>C <sub>8</sub> H <sub>5</sub> O <sub>2</sub> <sup>-</sup>                                                                                                                                                                                                                                                                                                                                                                                     |
| <i>p</i> -CF <sub>3</sub> C <sub>6</sub> H <sub>4</sub> O | 1410                                | 2.81       | 26         | 133 123 105<br>C <sub>8</sub> H <sub>5</sub> O <sub>2</sub> <sup>-</sup> C <sub>7</sub> H <sub>7</sub> O <sub>2</sub> <sup>-</sup> C <sub>7</sub> H <sub>5</sub> O <sup>-</sup><br>93 161 201<br>C <sub>6</sub> H <sub>5</sub> O <sup>-</sup> C <sub>7</sub> H <sub>4</sub> F <sub>3</sub> O <sup>-</sup> C <sub>9</sub> H <sub>4</sub> F <sub>3</sub> O <sub>2</sub> <sup>-</sup><br>275 237                                                        |
| <i>p</i> -MeOC <sub>6</sub> H <sub>4</sub> COO            | 1426                                | 2.90       | 10         | 133<br>C <sub>8</sub> H <sub>5</sub> O <sub>2</sub> <sup>-</sup>                                                                                                                                                                                                                                                                                                                                                                                     |
| CH <sub>3</sub> COO                                       | 1436                                | 2.52       | 100        | - CH <sub>2</sub> CO                                                                                                                                                                                                                                                                                                                                                                                                                                 |
| HCOO                                                      | 1449                                | 2.18       | 100        | - CO                                                                                                                                                                                                                                                                                                                                                                                                                                                 |
| H <sub>2</sub> N(CH <sub>2</sub> ) <sub>3</sub> COO       | 1451                                | 2.65       | 98         | - C <sub>4</sub> H <sub>7</sub> NO                                                                                                                                                                                                                                                                                                                                                                                                                   |
| H <sub>2</sub> N(CH <sub>2</sub> ) <sub>3</sub> COO       | 1451                                | 2.42       | 2          | 133<br>C <sub>8</sub> H <sub>5</sub> O <sub>2</sub> <sup>-</sup>                                                                                                                                                                                                                                                                                                                                                                                     |
| C <sub>6</sub> H <sub>5</sub> O                           | 1463                                | 2.99       | 36         | 133<br>C <sub>8</sub> H <sub>5</sub> O <sub>2</sub> <sup>-</sup>                                                                                                                                                                                                                                                                                                                                                                                     |
| <i>p</i> -MeOC <sub>6</sub> H <sub>4</sub> O              | 1466                                | 3.03       | 97         | 134 123 93<br>C <sub>8</sub> H <sub>6</sub> O <sub>2</sub> <sup>-</sup> C <sub>7</sub> H <sub>7</sub> O <sub>2</sub> <sup>-</sup> C <sub>6</sub> H <sub>5</sub> O <sup>-</sup><br>163 242 148<br>C <sub>9</sub> H <sub>7</sub> O <sub>3</sub> <sup>-</sup> C <sub>14</sub> H <sub>10</sub> O <sub>4</sub> <sup>-</sup> C <sub>9</sub> H <sub>8</sub> O <sub>2</sub> <sup>-</sup><br>108<br>C <sub>6</sub> H <sub>4</sub> O <sub>2</sub> <sup>-</sup> |



### Breakdown diagrams for the CID of the mass-selected ions.

TosO-pHP

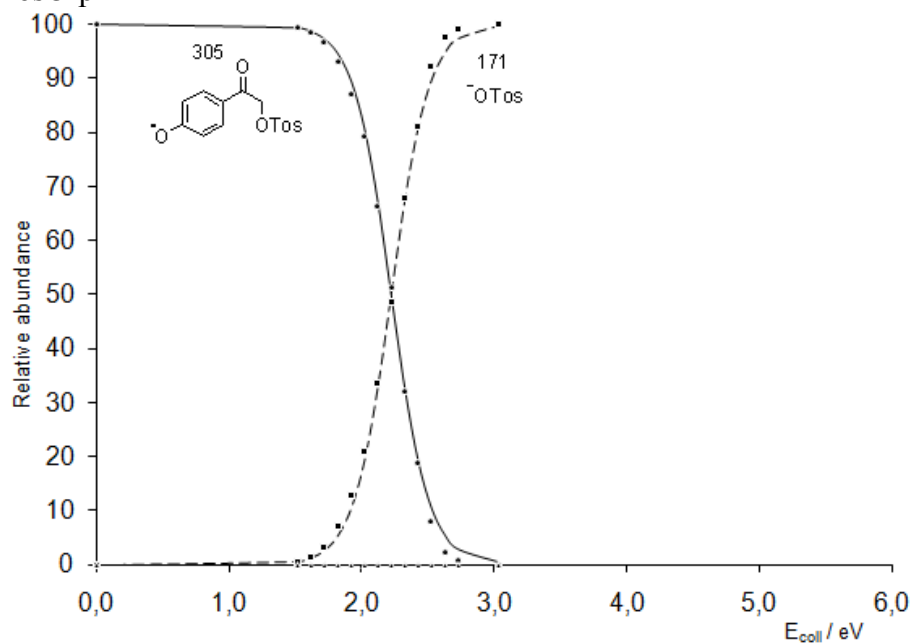

MsO-pHP

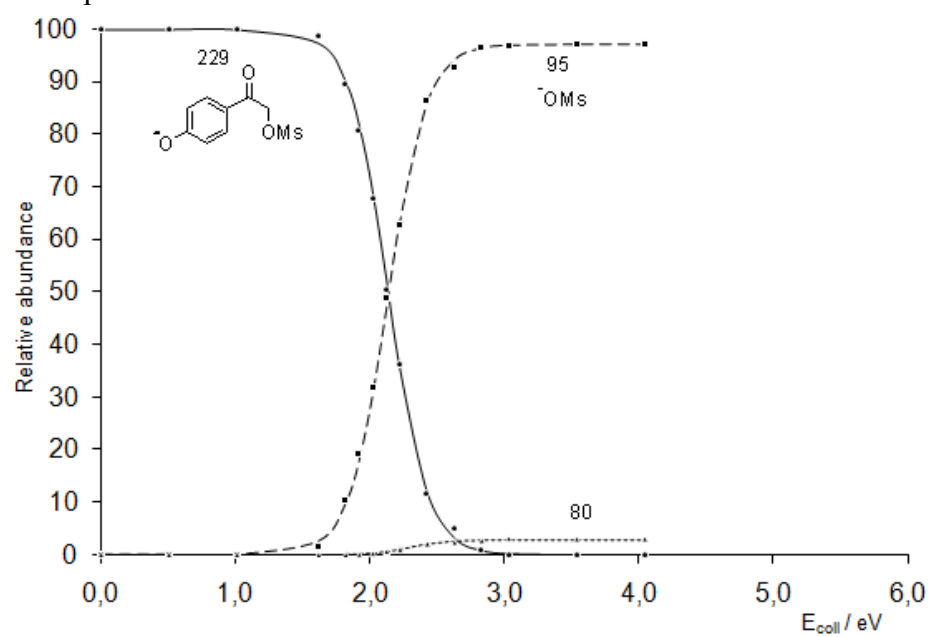

Branching ratio given in Table 1 corresponds to sum of  $m/z$  95 and 80, where  $m/z$  80 accords to  $\text{SO}_3^-$  which results from dissociation of  $^- \text{OMs}$ .

### $\text{CF}_3\text{COO-pHP}$

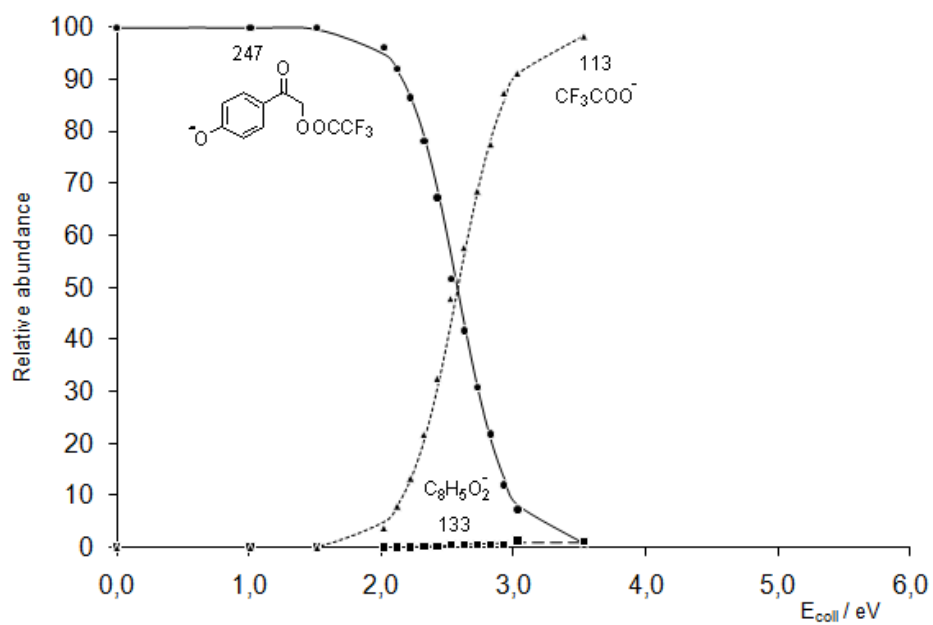

### $(\text{EtO})_2\text{P(O)O-pHP}$

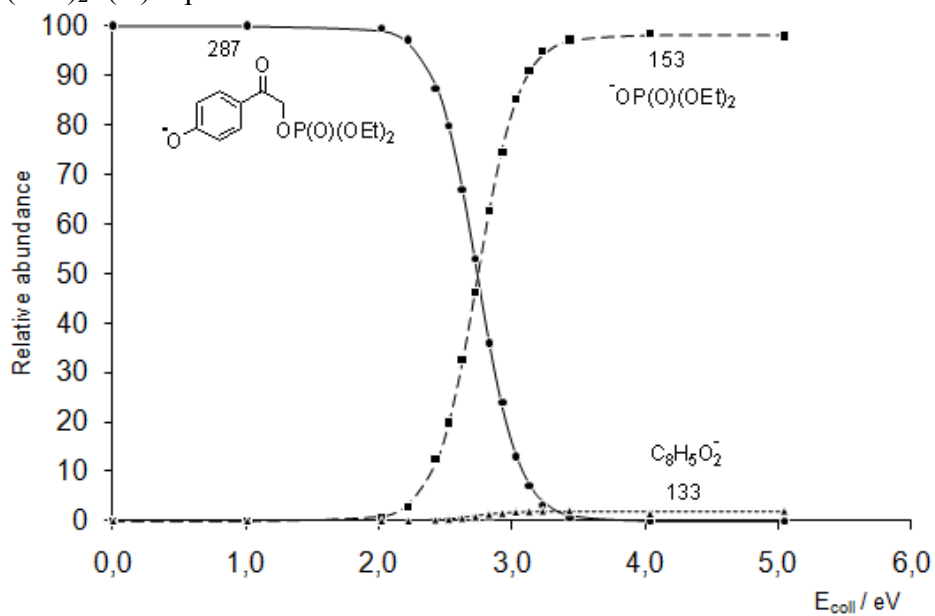

PhO-pHP

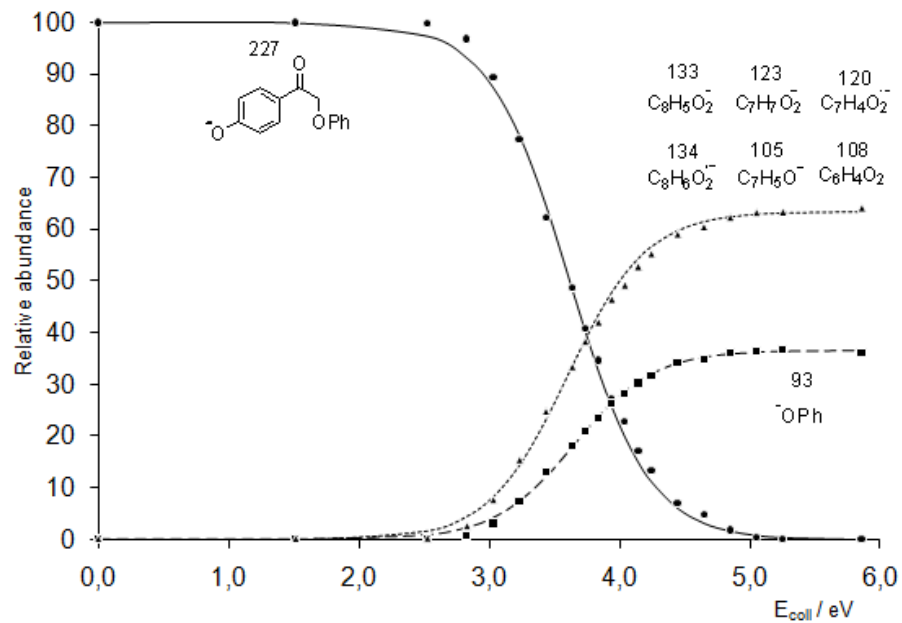

*p*-MeO-C<sub>6</sub>H<sub>4</sub>COO-pHP

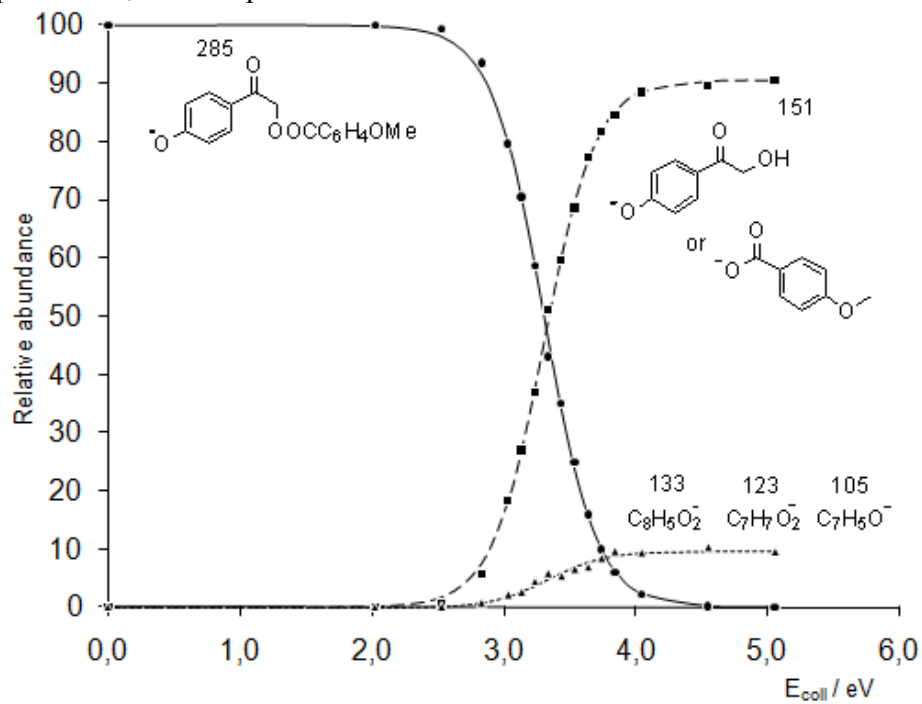

(PhO)<sub>2</sub>P(O)O-pHP

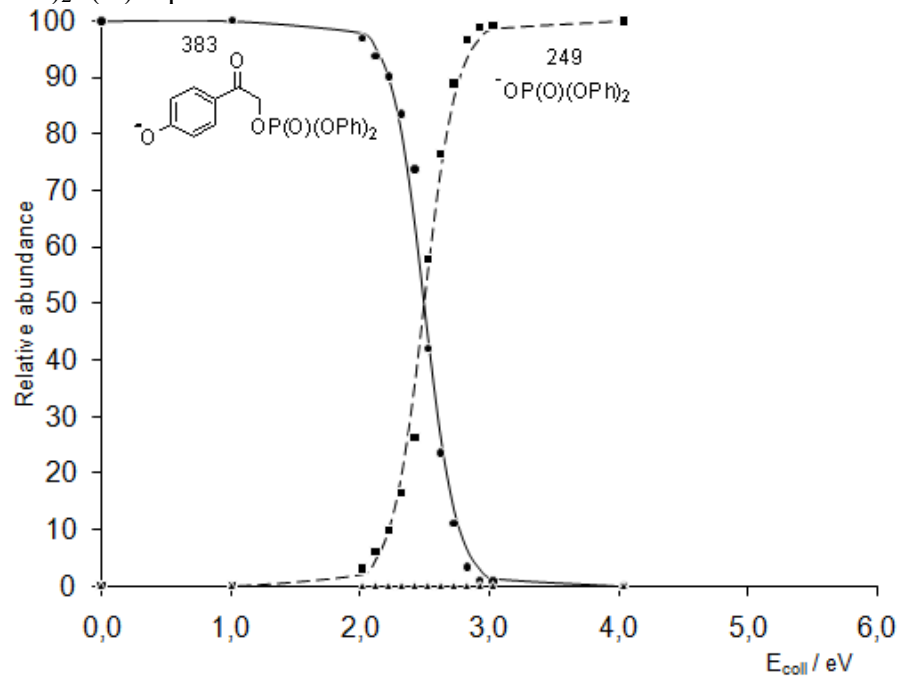

*p*-MeO-C<sub>6</sub>H<sub>4</sub>O-pHP

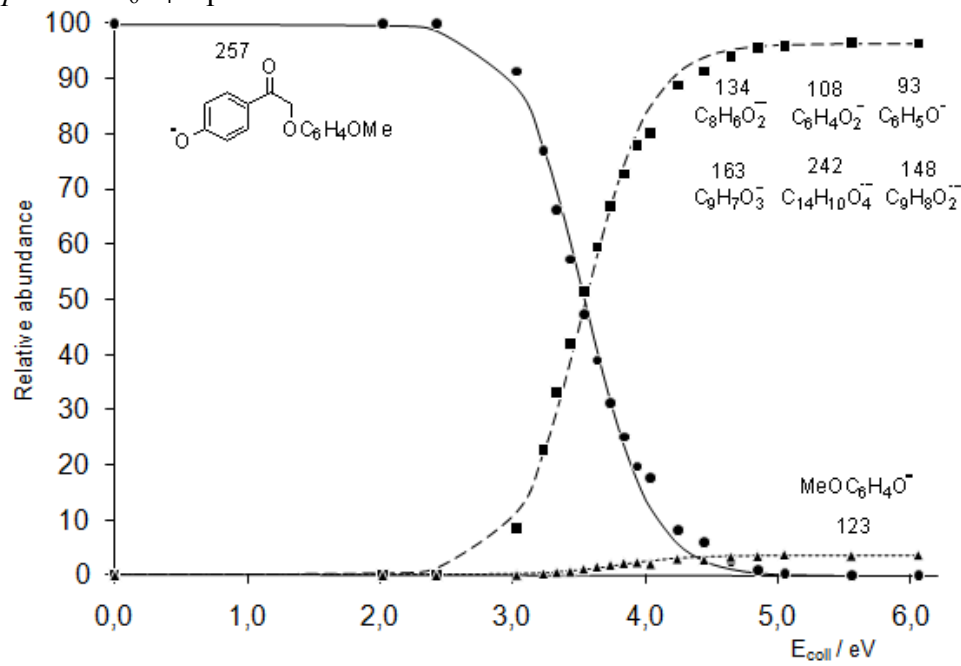

*p*-CF<sub>3</sub>-C<sub>6</sub>H<sub>4</sub>O-pHP

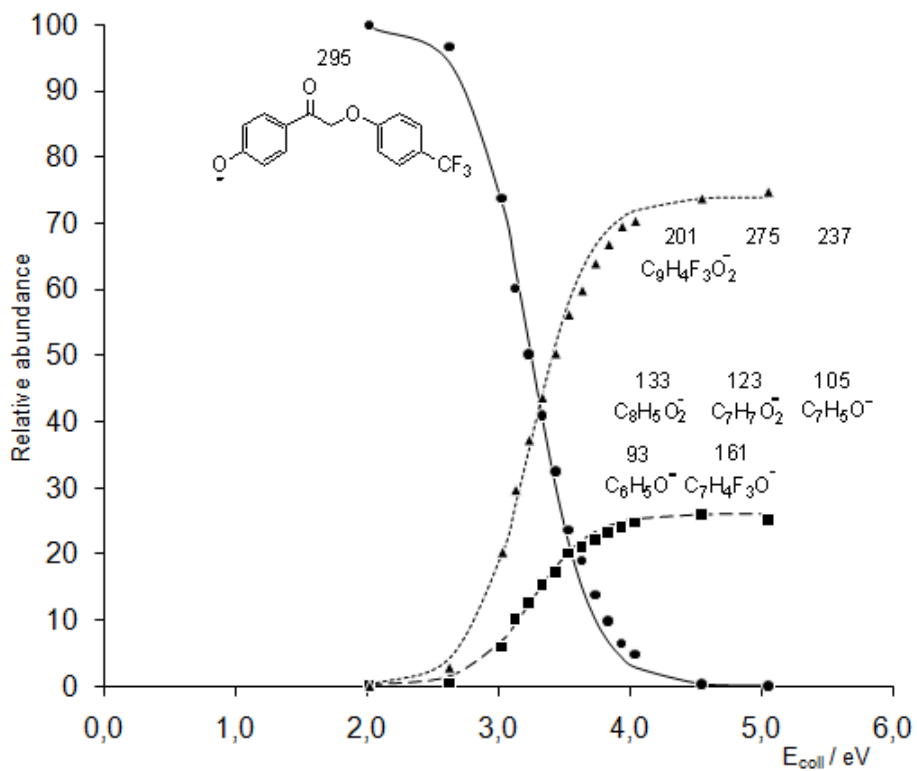

HCOO-pHP

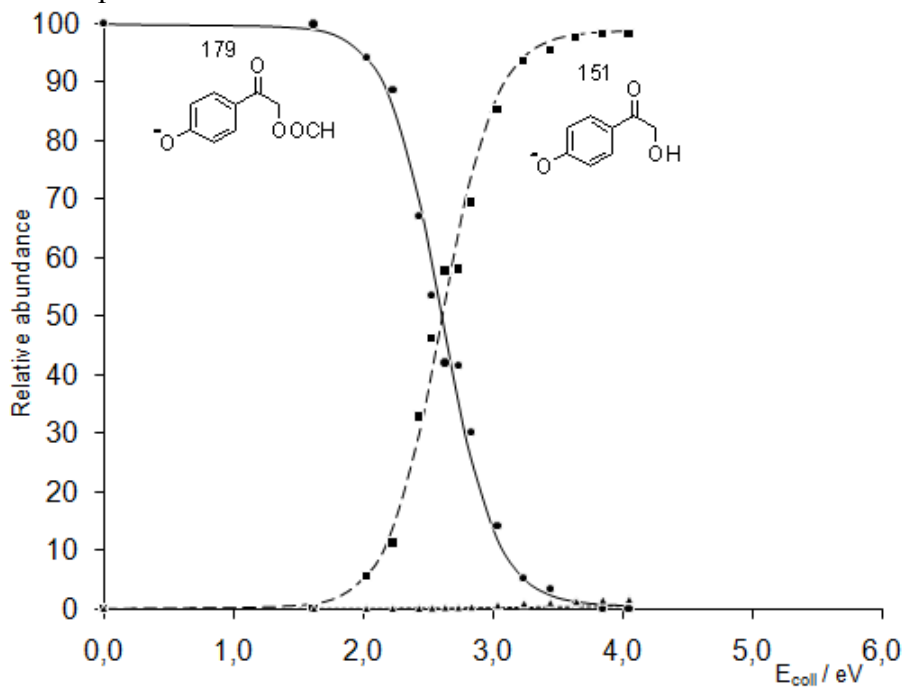

CH<sub>3</sub>COO-pHP

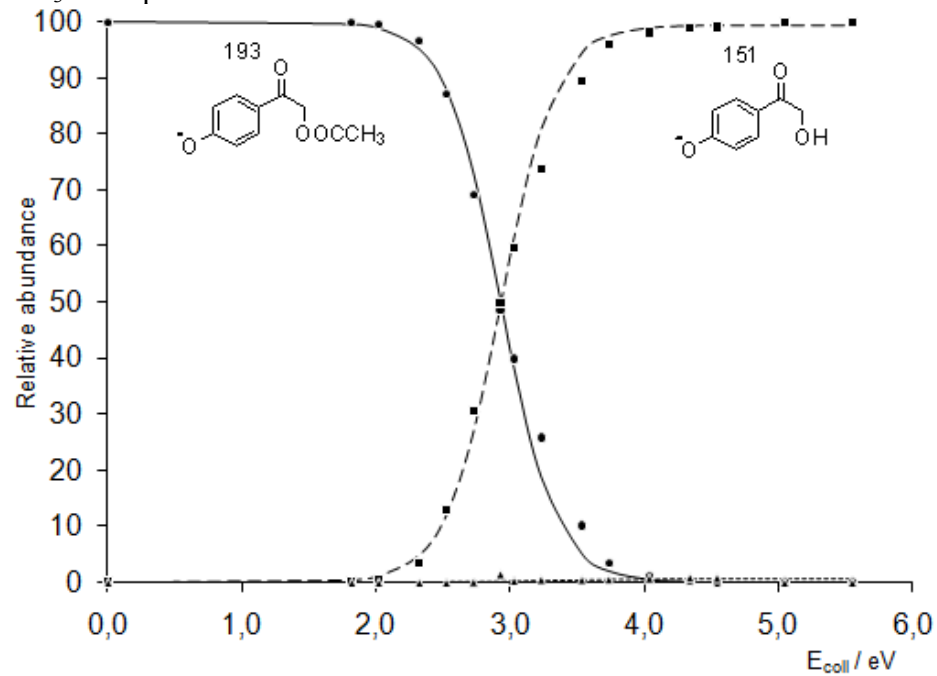

NH<sub>2</sub>(CH<sub>2</sub>)<sub>3</sub>COO-pHP

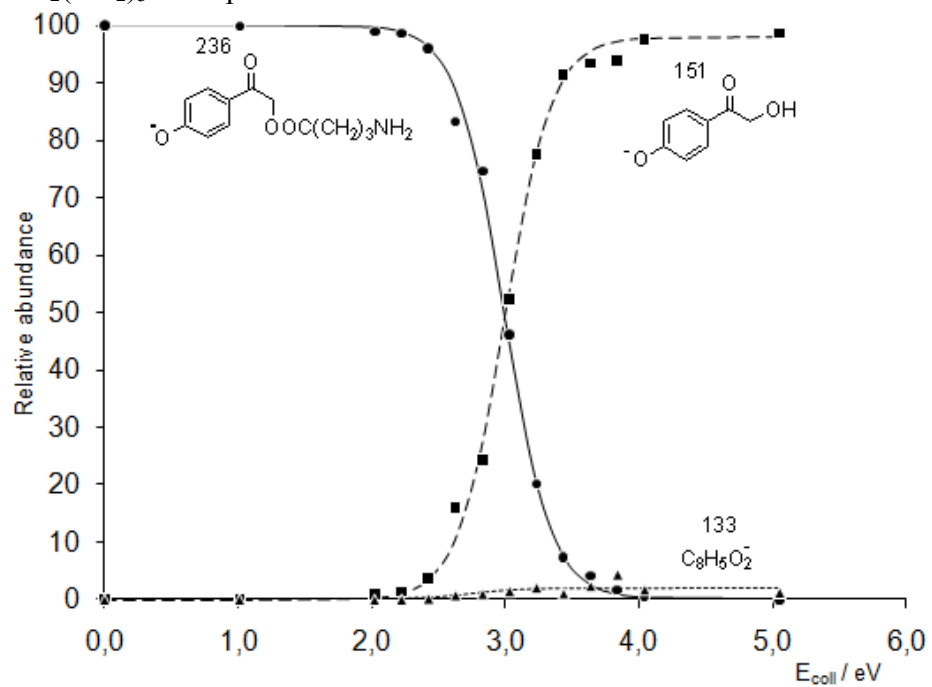

## Energies and Cartesian coordinates of the calculated structures

**Table S2:** Geometries and energetics for structures optimized at the **B3LYP/cc-pVTZ** level of theory. Oxygen is in red, carbon in green, fluor in yellow and hydrogen atoms are in blue.

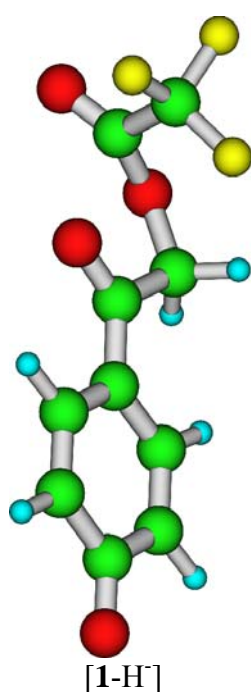

|                                              |                             |
|----------------------------------------------|-----------------------------|
| Zero-point correction=                       | 0.148472 (Hartree/Particle) |
| Thermal correction to Energy=                | 0.162943                    |
| Thermal correction to Enthalpy=              | 0.163887                    |
| Thermal correction to Gibbs Free Energy=     | 0.105262                    |
| Sum of electronic and zero-point Energies=   | -985.384563                 |
| Sum of electronic and thermal Energies=      | -985.370092                 |
| Sum of electronic and thermal Enthalpies=    | -985.369148                 |
| Sum of electronic and thermal Free Energies= | -985.427773                 |

| Center Number | Atomic Number | Atomic Type | Coordinates (Angstroms) |           |          |
|---------------|---------------|-------------|-------------------------|-----------|----------|
|               |               |             | X                       | Y         | Z        |
| 1             | 8             | 0           | -1.256138               | -0.494344 | 0.130429 |
| 2             | 6             | 0           | -0.716655               | -0.277380 | 1.232429 |
| 3             | 6             | 0           | 0.708296                | -0.022544 | 1.374355 |
| 4             | 6             | 0           | 1.289638                | 0.217316  | 2.584588 |
| 5             | 6             | 0           | 0.539821                | 0.230502  | 3.794469 |
| 6             | 6             | 0           | -0.858624               | -0.019279 | 3.684142 |
| 7             | 6             | 0           | -1.457863               | -0.256597 | 2.484990 |
| 8             | 1             | 0           | 1.296206                | -0.027374 | 0.464382 |
| 9             | 1             | 0           | 2.358264                | 0.399739  | 2.614805 |
| 10            | 6             | 0           | 1.123423                | 0.459111  | 5.069681 |
| 11            | 1             | 0           | -1.438174               | -0.014405 | 4.598919 |
| 12            | 1             | 0           | -2.523343               | -0.443143 | 2.420489 |
| 13            | 8             | 0           | 0.516345                | 0.479897  | 6.156570 |
| 14            | 6             | 0           | 2.641925                | 0.667659  | 5.185182 |
| 15            | 1             | 0           | 3.030679                | 1.341484  | 4.426906 |
| 16            | 8             | 0           | 2.947574                | 1.302178  | 6.430206 |
| 17            | 1             | 0           | 3.156637                | -0.290586 | 5.099435 |
| 18            | 6             | 0           | 2.270795                | 1.005957  | 7.565094 |
| 19            | 8             | 0           | 1.993665                | 1.849097  | 8.371155 |
| 20            | 6             | 0           | 2.291518                | -0.467753 | 8.051442 |
| 21            | 9             | 0           | 2.462377                | -1.399310 | 7.095472 |
| 22            | 9             | 0           | 3.348780                | -0.603625 | 8.897709 |
| 23            | 9             | 0           | 1.193507                | -0.775851 | 8.739110 |

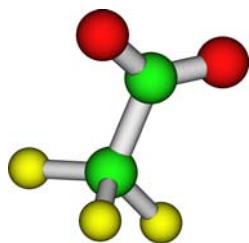

|                                              |                             |
|----------------------------------------------|-----------------------------|
| Zero-point correction=                       | 0.025565 (Hartree/Particle) |
| Thermal correction to Energy=                | 0.031643                    |
| Thermal correction to Enthalpy=              | 0.032587                    |
| Thermal correction to Gibbs Free Energy=     | -0.005936                   |
| Sum of electronic and zero-point Energies=   | -526.443846                 |
| Sum of electronic and thermal Energies=      | -526.437768                 |
| Sum of electronic and thermal Enthalpies=    | -526.436824                 |
| Sum of electronic and thermal Free Energies= | -526.475347                 |

| Center Number | Atomic Number | Atomic Type | Coordinates (Angstroms) |           |          |
|---------------|---------------|-------------|-------------------------|-----------|----------|
|               |               |             | X                       | Y         | Z        |
| 1             | 8             | 0           | 0.029981                | 0.000000  | 0.029104 |
| 2             | 6             | 0           | 0.148907                | 0.000000  | 1.262689 |
| 3             | 8             | 0           | 1.132631                | 0.000000  | 2.019017 |
| 4             | 6             | 0           | -1.218743               | 0.000000  | 2.063456 |
| 5             | 9             | 0           | -2.333599               | 0.000000  | 1.290220 |
| 6             | 9             | 0           | -1.340639               | -1.086990 | 2.878114 |
| 7             | 9             | 0           | -1.340639               | 1.086990  | 2.878114 |

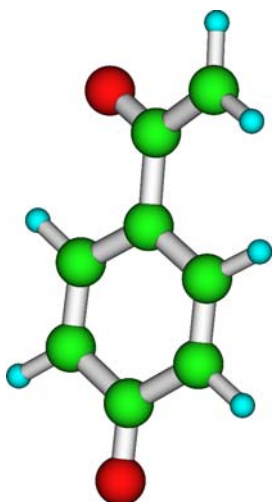

<sup>3</sup>3

Zero-point correction= 0.115231 (Hartree/Particle)  
 Thermal correction to Energy= 0.123764  
 Thermal correction to Enthalpy= 0.124708  
 Thermal correction to Gibbs Free Energy= 0.080075  
 Sum of electronic and zero-point Energies= -458.863584  
 Sum of electronic and thermal Energies= -458.855051  
 Sum of electronic and thermal Enthalpies= -458.854107  
 Sum of electronic and thermal Free Energies= -458.898740

| Center Number | Atomic Number | Atomic Type | Coordinates (Angstroms) |           |           |
|---------------|---------------|-------------|-------------------------|-----------|-----------|
|               |               |             | X                       | Y         | Z         |
| 1             | 6             | 0           | -0.043170               | 0.082877  | 0.081615  |
| 2             | 8             | 0           | -0.079120               | 0.172351  | 1.323903  |
| 3             | 6             | 0           | 1.215691                | -0.037694 | -0.631706 |
| 4             | 6             | 0           | 1.248005                | -0.128918 | -1.995614 |
| 5             | 6             | 0           | 0.054126                | -0.111686 | -2.752091 |
| 6             | 6             | 0           | -1.188933               | -0.010338 | -2.083616 |
| 7             | 6             | 0           | -1.249629               | 0.089056  | -0.723666 |
| 8             | 1             | 0           | 2.118332                | -0.054302 | -0.036709 |
| 9             | 1             | 0           | 2.201254                | -0.229288 | -2.495120 |
| 10            | 6             | 0           | 0.042471                | -0.217762 | -4.238751 |
| 11            | 1             | 0           | -2.085507               | -0.012291 | -2.686499 |
| 12            | 1             | 0           | -2.191124               | 0.175129  | -0.198916 |
| 13            | 8             | 0           | -1.041876               | -0.389901 | -4.827890 |
| 14            | 6             | 0           | 1.239285                | -0.109756 | -5.010743 |
| 15            | 1             | 0           | 2.203985                | 0.127505  | -4.590102 |
| 16            | 1             | 0           | 1.152284                | -0.234148 | -6.079512 |

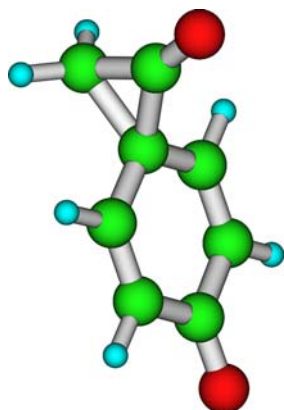

<sup>1</sup>4

Zero-point correction= 0.117223 (Hartree/Particle)  
 Thermal correction to Energy= 0.125472  
 Thermal correction to Enthalpy= 0.126416  
 Thermal correction to Gibbs Free Energy= 0.083803  
 Sum of electronic and zero-point Energies= -458.867723  
 Sum of electronic and thermal Energies= -458.859474  
 Sum of electronic and thermal Enthalpies= -458.858530  
 Sum of electronic and thermal Free Energies= -458.901144

| Center Number | Atomic Number | Atomic Type | Coordinates (Angstroms) |           |           |
|---------------|---------------|-------------|-------------------------|-----------|-----------|
|               |               |             | X                       | Y         | Z         |
| 1             | 8             | 0           | 0.052369                | -0.293015 | -0.196754 |
| 2             | 6             | 0           | -0.000007               | -0.152112 | 1.016788  |
| 3             | 6             | 0           | 1.209492                | 0.043639  | 1.834693  |
| 4             | 6             | 0           | 1.152833                | 0.186011  | 3.165492  |
| 5             | 6             | 0           | -0.119790               | 0.129236  | 3.889269  |
| 6             | 6             | 0           | -1.333666               | -0.013798 | 3.081375  |
| 7             | 6             | 0           | -1.277401               | -0.156202 | 1.750563  |
| 8             | 1             | 0           | 2.150251                | 0.072448  | 1.301779  |
| 9             | 1             | 0           | 2.057676                | 0.329344  | 3.744866  |
| 10            | 6             | 0           | -0.114165               | -0.521555 | 5.268470  |
| 11            | 1             | 0           | -2.286623               | -0.019753 | 3.597901  |
| 12            | 1             | 0           | -2.172775               | -0.274941 | 1.155534  |
| 13            | 6             | 0           | -0.229792               | 0.914260  | 5.276274  |
| 14            | 1             | 0           | -1.191107               | 1.362657  | 5.495561  |
| 15            | 1             | 0           | 0.630792                | 1.509031  | 5.557196  |
| 16            | 8             | 0           | -0.050433               | -1.557455 | 5.844378  |

<sup>1</sup>5

Zero-point correction= 0.108886 (Hartree/Particle)  
 Thermal correction to Energy= 0.115278  
 Thermal correction to Enthalpy= 0.116222  
 Thermal correction to Gibbs Free Energy= 0.079072  
 Sum of electronic and zero-point Energies= -345.557439  
 Sum of electronic and thermal Energies= -345.551048  
 Sum of electronic and thermal Enthalpies= -345.550104  
 Sum of electronic and thermal Free Energies= -345.587254

Charge = 0 Multiplicity = 1  
 O,0,0.,0.,0.1333536931  
 C,0,0.,0.,1.3572690381  
 C,0,1.2507609724,0.,2.1363923493  
 C,0,1.2434836285,0.,3.4777848401  
 C,0,0.,0.,4.2367300397



35

C,0,-1.2434836285,0.,3.4777848401  
 C,0,-1.2507609724,0.,2.1363923493  
 H,0,2.1701657037,0.,1.5664070008  
 H,0,2.1714855868,0.,4.037183667  
 C,0,0.,0.,5.5827020067  
 H,0,-2.1714855868,0.,4.037183667  
 H,0,-2.1701657037,0.,1.5664070008  
 H,0,-0.9230103721,0.,6.1467047541  
 H,0,0.9230103721,0.,6.1467047541  
 Zero-point correction= 0.104549 (Hartree/Particle)  
 Thermal correction to Energy= 0.111463  
 Thermal correction to Enthalpy= 0.112408  
 Thermal correction to Gibbs Free Energy= 0.073432  
 Sum of electronic and zero-point Energies= -345.493301  
 Sum of electronic and thermal Energies= -345.486387  
 Sum of electronic and thermal Enthalpies= -345.485443  
 Sum of electronic and thermal Free Energies= -345.524418

Charge = 0 Multiplicity = 3

O,0,0.,0.,0.0822704281  
 C,0,0.,0.,1.3603805464  
 C,0,1.2216026824,0.,2.1034121097  
 C,0,1.2119216718,0.,3.4845009357  
 C,0,0.,0.,4.2022936698  
 C,0,-1.2119216718,0.,3.4845009357  
 C,0,-1.2216026824,0.,2.1034121097  
 H,0,2.1470357836,0.,1.5442160467  
 H,0,2.1461362735,0.,4.0310740258  
 C,0,0.,0.,5.6551160466  
 H,0,-2.1461362735,0.,4.0310740258  
 H,0,-2.1470357836,0.,1.5442160467  
 H,0,-0.9278967421,0.,6.2062665369  
 H,0,0.9278967421,0.,6.2062665369

Zero-point correction= 0.118903 (Hartree/Particle)  
 Thermal correction to Energy= 0.126965  
 Thermal correction to Enthalpy= 0.127909  
 Thermal correction to Gibbs Free Energy= 0.085724  
 Sum of electronic and zero-point Energies= -458.866414  
 Sum of electronic and thermal Energies= -458.858352  
 Sum of electronic and thermal Enthalpies= -458.857408  
 Sum of electronic and thermal Free Energies= -458.899594

17

Charge = 0 Multiplicity = 1

O,0,-0.0533173384,-0.0262859195,0.1102853264  
 C,0,-0.0218090043,-0.0033832986,1.3361946269  
 C,0,1.2398478672,0.1102056767,2.0826374931  
 C,0,1.268463486,0.1348400004,3.4270199962  
 C,0,0.0479928914,0.0498029284,4.1999286026  
 C,0,-1.2106634179,-0.0628862877,3.4928816825  
 C,0,-1.2454986649,-0.0880135182,2.1488786796  
 H,0,2.1442622192,0.1729385812,1.4928542582  
 H,0,2.207532555,0.2190207988,3.9606745559  
 C,0,0.0921405267,0.0756408614,5.5418153663  
 H,0,-2.1205489856,-0.1261604051,4.0763325107  
 H,0,-2.1774241934,-0.1717689785,1.6061833284  
 O,0,-0.7529854433,0.0250041803,6.5733830238  
 C,0,0.7159240345,0.1470357087,6.8278523871  
 H,0,1.1556143931,-0.7368984227,7.2729136577  
 H,0,1.0079833515,1.103936648,7.2423264345

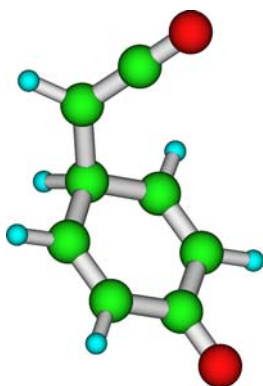

18

Zero-point correction= 0.117632 (Hartree/Particle)  
 Thermal correction to Energy= 0.126251  
 Thermal correction to Enthalpy= 0.127195  
 Thermal correction to Gibbs Free Energy= 0.082794  
 Sum of electronic and zero-point Energies= -458.889785  
 Sum of electronic and thermal Energies= -458.881166  
 Sum of electronic and thermal Enthalpies= -458.880222  
 Sum of electronic and thermal Free Energies= -458.924622

| Center Number | Atomic Number | Atomic Type | Coordinates (Angstroms) |           |           |
|---------------|---------------|-------------|-------------------------|-----------|-----------|
|               |               |             | X                       | Y         | Z         |
| 1             | 8             | 0           | 0.107386                | -0.550993 | -0.038320 |
| 2             | 6             | 0           | 0.064036                | -0.256967 | 1.145105  |
| 3             | 6             | 0           | 1.290462                | -0.054866 | 1.943222  |
| 4             | 6             | 0           | 1.249146                | 0.276850  | 3.234391  |
| 5             | 6             | 0           | -0.029532               | 0.479783  | 3.989865  |
| 6             | 6             | 0           | -1.256544               | 0.252754  | 3.153154  |
| 7             | 6             | 0           | -1.212852               | -0.080926 | 1.862286  |
| 8             | 1             | 0           | 2.227013                | -0.187786 | 1.417877  |
| 9             | 1             | 0           | 2.164778                | 0.422758  | 3.795979  |
| 10            | 6             | 0           | -0.082008               | -0.331444 | 5.283350  |
| 11            | 1             | 0           | -2.208123               | 0.369814  | 3.658763  |
| 12            | 1             | 0           | -2.111753               | -0.242648 | 1.282061  |
| 13            | 1             | 0           | -0.736586               | -0.020625 | 6.085650  |
| 14            | 6             | 0           | 0.580851                | -1.446725 | 5.472478  |
| 15            | 8             | 0           | 1.183119                | -2.422427 | 5.652136  |
| 16            | 1             | 0           | -0.043602               | 1.532490  | 4.308393  |

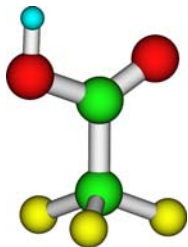

CF<sub>3</sub>COOH

Zero-point correction= 0.038824 (Hartree/Particle)  
 Thermal correction to Energy= 0.045057  
 Thermal correction to Enthalpy= 0.046001  
 Thermal correction to Gibbs Free Energy= 0.007481  
 Sum of electronic and zero-point Energies= -526.965937  
 Sum of electronic and thermal Energies= -526.959704  
 Sum of electronic and thermal Enthalpies= -526.958759  
 Sum of electronic and thermal Free Energies= -526.997279

| Center Number | Atomic Number | Atomic Type | Coordinates (Angstroms) |           |           |
|---------------|---------------|-------------|-------------------------|-----------|-----------|
|               |               |             | X                       | Y         | Z         |
| 1             | 6             | 0           | -0.023036               | -0.015000 | 0.052847  |
| 2             | 9             | 0           | -0.389638               | 0.159232  | 1.331214  |
| 3             | 9             | 0           | 1.298712                | -0.140632 | 0.003020  |
| 4             | 6             | 0           | -0.707153               | -1.272758 | -0.538511 |
| 5             | 8             | 0           | -2.035709               | -1.136052 | -0.483057 |
| 6             | 9             | 0           | -0.376551               | 1.078337  | -0.638985 |
| 7             | 8             | 0           | -0.108350               | -2.210199 | -0.972350 |
| 8             | 1             | 0           | -2.433054               | -1.936419 | -0.859194 |

TS<sup>1</sup>/<sub>1</sub>/<sub>9</sub>

Zero-point correction= 0.144915 (Hartree/Particle)  
 Thermal correction to Energy= 0.160316  
 Thermal correction to Enthalpy= 0.161261  
 Thermal correction to Gibbs Free Energy= 0.098128  
 Sum of electronic and zero-point Energies= -985.348360  
 Sum of electronic and thermal Energies= -985.332959  
 Sum of electronic and thermal Enthalpies= -985.332015  
 Sum of electronic and thermal Free Energies= -985.395147

Charge = -1 Multiplicity = 1  
 C,0,-0.0382595864,0.062631804,-0.0302603338  
 C,0,-0.0030222738,-0.1303934796,1.3924587204  
 C,0,1.1718429069,-0.2273292333,2.0534066173  
 C,0,2.4612789991,-0.1415723163,1.3623314854  
 C,0,2.3867780301,0.0515904338,-0.0836948016  
 C,0,1.2073829606,0.1478336493,-0.7415989663  
 O,0,3.5353294006,-0.2273905423,1.9712690653  
 C,0,-1.2272755664,0.1675417383,-0.6919272702  
 C,0,-1.8870153193,0.3534240095,-1.9419364736  
 O,0,-2.4820965815,0.146565052,-0.3551493609  
 O,0,-0.3588273484,0.6118950401,-3.7045170043  
 C,0,-0.6756382702,-0.2004410497,-4.6085613453

---

C,0,0.2697243124,-0.1122176524,-5.8572019615  
F,0,0.1532746067,1.0906972117,-6.4749090248  
O,0,-1.5950523863,-1.0209532693,-4.6668403931  
F,0,1.5724914661,-0.2491067808,-5.518231348  
F,0,0.0150458581,-1.0482939931,-6.7913924644  
H,0,3.3294724437,0.1151829365,-0.6115895623  
H,0,1.1665044125,0.2922745989,-1.814703198  
H,0,-0.9461499925,-0.1963346065,1.9220962362  
H,0,1.2086458977,-0.3728019248,3.1256982209  
H,0,-2.1796063029,-0.4865511482,-2.5520318377  
H,0,-2.139332723,1.3497165044,-2.2584865402

---

TS <sup>1</sup>/<sub>1</sub><sup>10</sup>

Zero-point correction= 0.143089 (Hartree/Particle)  
Thermal correction to Energy= 0.158780  
Thermal correction to Enthalpy= 0.159724  
Thermal correction to Gibbs Free Energy= 0.095513  
Sum of electronic and zero-point Energies= -985.333364  
Sum of electronic and thermal Energies= -985.317674  
Sum of electronic and thermal Enthalpies= -985.316730  
Sum of electronic and thermal Free Energies= -985.380941

Charge = -1 Multiplicity = 1

C,0,-2.1981179582,0.4761491861,-0.1806068323  
C,0,-2.9355667651,0.649385763,1.0404734652  
C,0,-4.1678712252,0.1154593677,1.201372938  
C,0,-4.8268701102,-0.6573260739,0.1481388079  
C,0,-4.0507553204,-0.8230586461,-1.0783586806  
C,0,-2.811618146,-0.2986527886,-1.2229847458  
O,0,-5.9574911329,-1.137825764,0.2895009303  
C,0,-0.9799584863,1.3044218797,-0.404020129  
O,0,-0.7709661056,2.4871717825,-0.3622645342  
C,0,-0.2972520841,0.0652568084,-0.2190451666  
O,0,2.1955678011,-0.397957095,1.3884631815  
C,0,2.6234731708,-0.1875300007,0.2472763128  
O,0,2.0248458129,0.084396876,-0.817643705  
C,0,4.1792183932,-0.2847140677,0.0578177191  
F,0,4.8501157957,-0.5106063207,1.2038301039  
F,0,4.5083701091,-1.2953411644,-0.7860327109  
F,0,4.6953047928,0.8473799741,-0.4743880554  
H,0,-4.514737529,-1.3924250623,-1.8732559034  
H,0,-2.2675603748,-0.4377074034,-2.1502740956  
H,0,-2.4799854473,1.2334093023,1.8312825167  
H,0,-4.7211403791,0.2459854161,2.1226090366  
H,0,-0.2826197761,-0.6844335222,-0.9867509415  
H,0,0.1897869645,-0.1503824468,0.7278474884

---

TS <sup>1</sup>/<sub>4</sub><sup>17</sup>

Zero-point correction= 0.115637 (Hartree/Particle)  
Thermal correction to Energy= 0.123698  
Thermal correction to Enthalpy= 0.124642  
Thermal correction to Gibbs Free Energy= 0.082396  
Sum of electronic and zero-point Energies= -458.829963  
Sum of electronic and thermal Energies= -458.821902  
Sum of electronic and thermal Enthalpies= -458.820958  
Sum of electronic and thermal Free Energies= -458.863205

Charge = 0 Multiplicity = 1

O,0,-0.0887845795,0.0012257359,0.0619002023  
C,0,-0.0318837796,0.001022467,1.2902882898  
C,0,1.2494580118,-0.0060026059,2.0076450825  
C,0,1.3059939618,-0.0023431448,3.3581901963  
C,0,0.1073891214,-0.0079078368,4.1401450442  
C,0,-1.1590710584,0.0023970459,3.4743071463  
C,0,-1.2377003884,0.0090069842,2.1248934779  
C,0,0.1734894836,0.0095258496,5.5352737827  
O,0,1.1553526667,0.1828373212,6.3221055578  
C,0,-0.8689489858,-0.0766164064,6.5058572981  
H,0,-0.7243705008,-0.7767165173,7.3149791332  
H,0,-1.6511596117,0.6687694234,6.606629194  
H,0,2.1428257924,-0.0262425713,1.3986303102  
H,0,2.2538579232,-0.003963557,3.8811618342  
H,0,-2.0632293399,-0.0027700508,4.0730382736  
H,0,-2.1862931903,0.0277753859,1.6065704684

---

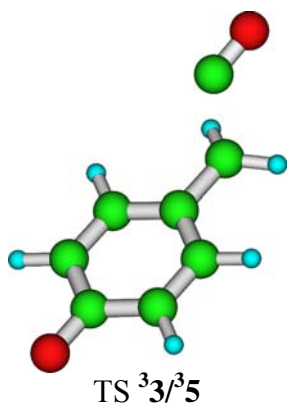

NImag=1  
 Zero-point correction= 0.111765 (Hartree/Particle)  
 Thermal correction to Energy= 0.121233  
 Thermal correction to Enthalpy= 0.122177  
 Thermal correction to Gibbs Free Energy= 0.073417  
 Sum of electronic and zero-point Energies= -458.837878  
 Sum of electronic and thermal Energies= -458.828410  
 Sum of electronic and thermal Enthalpies= -458.827466  
 Sum of electronic and thermal Free Energies= -458.876226

| Center Number | Atomic Number | Atomic Type | Coordinates (Angstroms) |           |           |
|---------------|---------------|-------------|-------------------------|-----------|-----------|
|               |               |             | X                       | Y         | Z         |
| 1             | 6             | 0           | 0.195801                | 0.512864  | 0.054858  |
| 2             | 6             | 0           | 0.077323                | -0.398005 | 1.121799  |
| 3             | 6             | 0           | 1.187827                | -0.837705 | 1.805565  |
| 4             | 6             | 0           | 2.503638                | -0.379679 | 1.451961  |
| 5             | 6             | 0           | 2.599747                | 0.549658  | 0.359583  |
| 6             | 6             | 0           | 1.474787                | 0.975096  | -0.309376 |
| 7             | 1             | 0           | -0.905950               | -0.753729 | 1.402152  |
| 8             | 1             | 0           | 1.109107                | -1.538137 | 2.625508  |
| 9             | 8             | 0           | 3.530987                | -0.775508 | 2.075352  |
| 10            | 1             | 0           | 3.587053                | 0.896741  | 0.087797  |
| 11            | 1             | 0           | 1.566319                | 1.675437  | -1.129807 |
| 12            | 6             | 0           | -0.993699               | 0.965582  | -0.672266 |
| 13            | 1             | 0           | -0.911781               | 1.820677  | -1.328578 |
| 14            | 6             | 0           | -1.268357               | -0.498986 | -2.351048 |
| 15            | 1             | 0           | -1.969693               | 0.779062  | -0.246493 |
| 16            | 8             | 0           | -2.154435               | -0.323168 | -3.043898 |

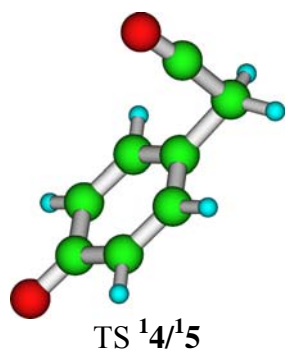

Zero-point correction= 0.115947 (Hartree/Particle)  
 Thermal correction to Energy= 0.124114  
 Thermal correction to Enthalpy= 0.125059  
 Thermal correction to Gibbs Free Energy= 0.082281  
 Sum of electronic and zero-point Energies= -458.853884  
 Sum of electronic and thermal Energies= -458.845716  
 Sum of electronic and thermal Enthalpies= -458.844772  
 Sum of electronic and thermal Free Energies= -458.887550

| Center Number | Atomic Number | Atomic Type | Coordinates (Angstroms) |           |           |
|---------------|---------------|-------------|-------------------------|-----------|-----------|
|               |               |             | X                       | Y         | Z         |
| 1             | 6             | 0           | -0.000419               | -0.114773 | 0.002200  |
| 2             | 6             | 0           | -0.002466               | -0.047310 | 1.421776  |
| 3             | 6             | 0           | 1.162768                | 0.007893  | 2.119704  |
| 4             | 6             | 0           | 2.466048                | 0.025973  | 1.458067  |
| 5             | 6             | 0           | 2.417332                | -0.035111 | -0.001564 |
| 6             | 6             | 0           | 1.243418                | -0.090019 | -0.684815 |
| 7             | 8             | 0           | 3.528179                | 0.083533  | 2.085068  |
| 8             | 6             | 0           | -1.297938               | -0.098887 | -0.765373 |
| 9             | 6             | 0           | -1.285544               | 1.326412  | -0.787622 |
| 10            | 8             | 0           | -1.224074               | 2.473025  | -0.776185 |
| 11            | 1             | 0           | 3.366516                | -0.047294 | -0.519937 |
| 12            | 1             | 0           | 1.250666                | -0.138714 | -1.769512 |
| 13            | 1             | 0           | -0.950091               | -0.063291 | 1.951627  |
| 14            | 1             | 0           | 1.165829                | 0.028133  | 3.201088  |
| 15            | 1             | 0           | -2.174252               | -0.483539 | -0.238750 |
| 16            | 1             | 0           | -1.266027               | -0.515134 | -1.774809 |
